# Supplementary material
Source: ML conference proceedings conference paper supplement (https://proceedings.neurips.cc/paper_files/paper/2022/hash/77911ed9e6e864ca1a3d165b2c3cb258-Abstract.html)
Supplement: Supplementary file 1 [file 77911ed9e6e864ca1a3d165b2c3cb258-Supplemental-Conference.zip]

Archive with 2 entries (2 files):
- checklist.pdf
- Quantized_Training_of_Gradient_Boosted_Decision_Trees__NeurIPS_2022_appendix.pdf
